# Supplementary material
Source: MDPI journal article supplement (https://www.mdpi.com/2306-5338/6/2/30)
Supplement: s1 [file s1]

APPENDIX A

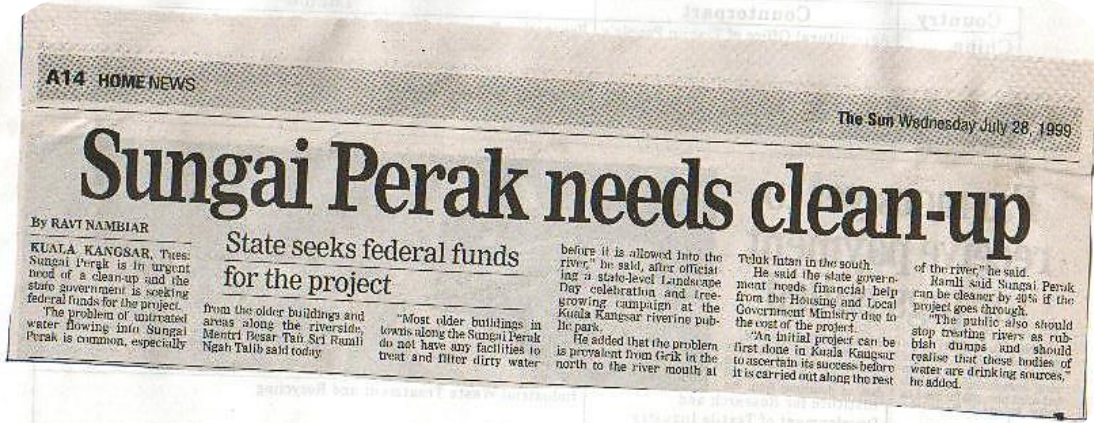

Newspaper article on 28 July, 1999.

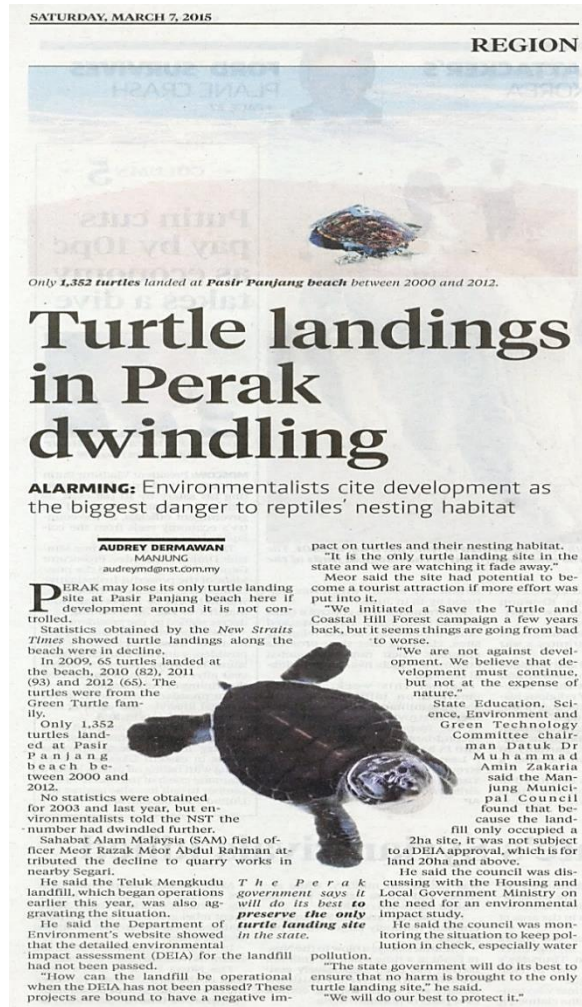

Newspaper article on 7 March 2015

## APPENDIX B

### Recovery Analysis (Spiked Analysis Results):

The spike results obtained were consistent with unspiked value for all elements. This shows that the digestion method used were reliable.

Table 4: Recovery of the total digestion procedure by using Spiked Analysis

| Heavy metals | Spiked value (ug/g) | Unspiked value (ug/g) | Recovery (%) |
|--------------|---------------------|-----------------------|--------------|
| Pb           | 35.11               | 33.13                 | 110.5        |
| Zn           | 52.00               | 51.78                 | 106          |
| Cd           | 3.84                | 3.62                  | 98.02        |
| Cu           | 17.47               | 17.26                 | 110.5        |
| Fe           | 36.54               | 36.4                  | 93.33        |

## APPENDIX C

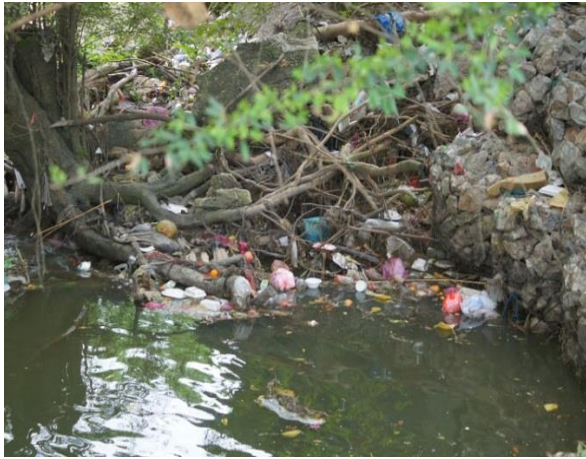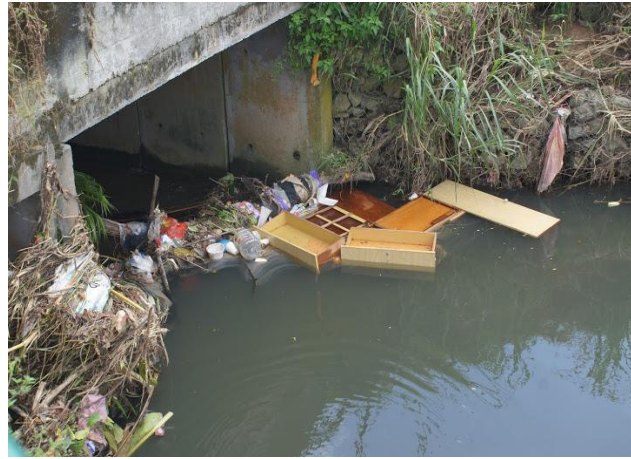

Sample spot viewed at upstream sites of Perak River.

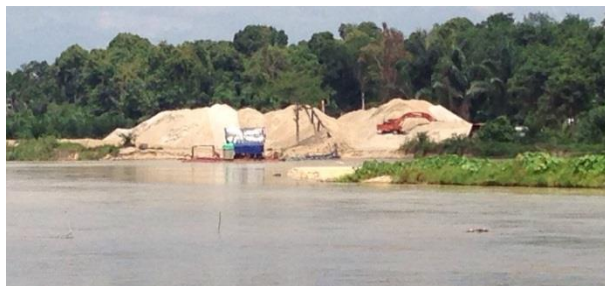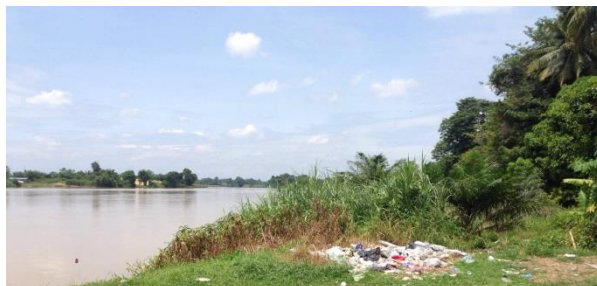

## Appendix D

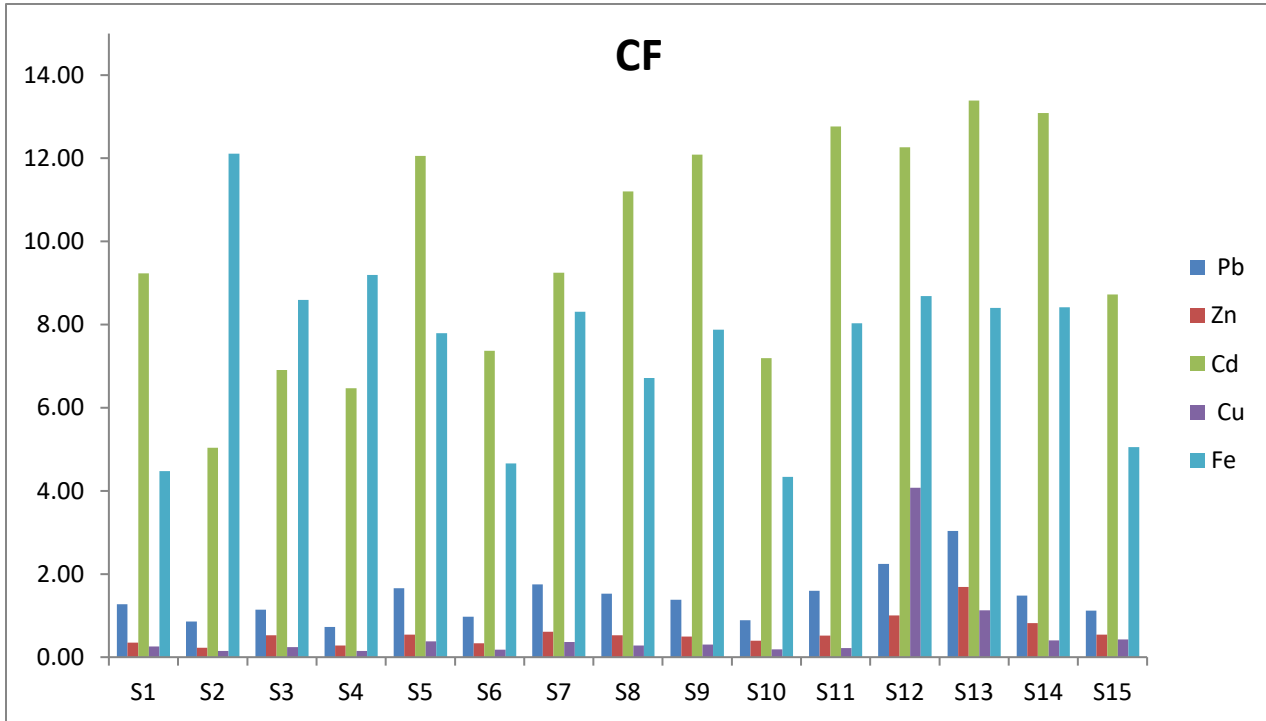

Contamination Factor of Surface Sediment in Perak River
